# Supplementary material for: The Use of Chitin for the Removal of Nitrates and Orthophosphates from Greenhouse Wastewater
Source: MDPI journal article supplement (doi:10.3390/molecules29061289), 2024-03-14
Supplement: s1 [file s1]

**Supplementary materials:**

## CH surface and porosity test report

### Summary Report

#### Surface Area

Single point surface area at  $p/p^\circ = 0.250270095$ : 2.4078 m<sup>2</sup>/g

BET Surface Area: 2.4859 m<sup>2</sup>/g

#### Pore Volume

Single point adsorption total pore volume of pores  
less than 2.3143 nm diameter at  $p/p^\circ = 0.250270095$ : 0.001141 cm<sup>3</sup>/g

#### Pore Size

Adsorption average pore width (4V/A by BET): 1.83625 nm

#### DFT Pore Size

|                       |    |           |   |                            |
|-----------------------|----|-----------|---|----------------------------|
| Volume in Pores       | <  | 1.416 nm  | : | 0.00000 cm <sup>3</sup> /g |
| Total Volume in Pores | <= | 38.734 nm | : | 0.00115 cm <sup>3</sup> /g |
| Area in Pores         | >  | 38.734 nm | : | 0.000 m <sup>2</sup> /g    |
| Total Area in Pores   | >= | 1.416 nm  | : | 1.937 m <sup>2</sup> /g    |

Started: 2022-10-26 9:54:00  
Completed: 2022-10-26 12:11:47  
Report Time: 2022-10-28 10:32:44  
Sample Mass: 0.1543 g  
Equilibration Interval: 5 s  
Sample Density: 1.000 g/cm<sup>3</sup>

Analysis Adsorptive: N2  
Analysis Bath Temp.: 77.370 K  
Thermal Correction: No  
Cold Free Space: -0.8919 cm<sup>3</sup> Measured  
Low Pressure Dose: None  
Automatic Degas: No

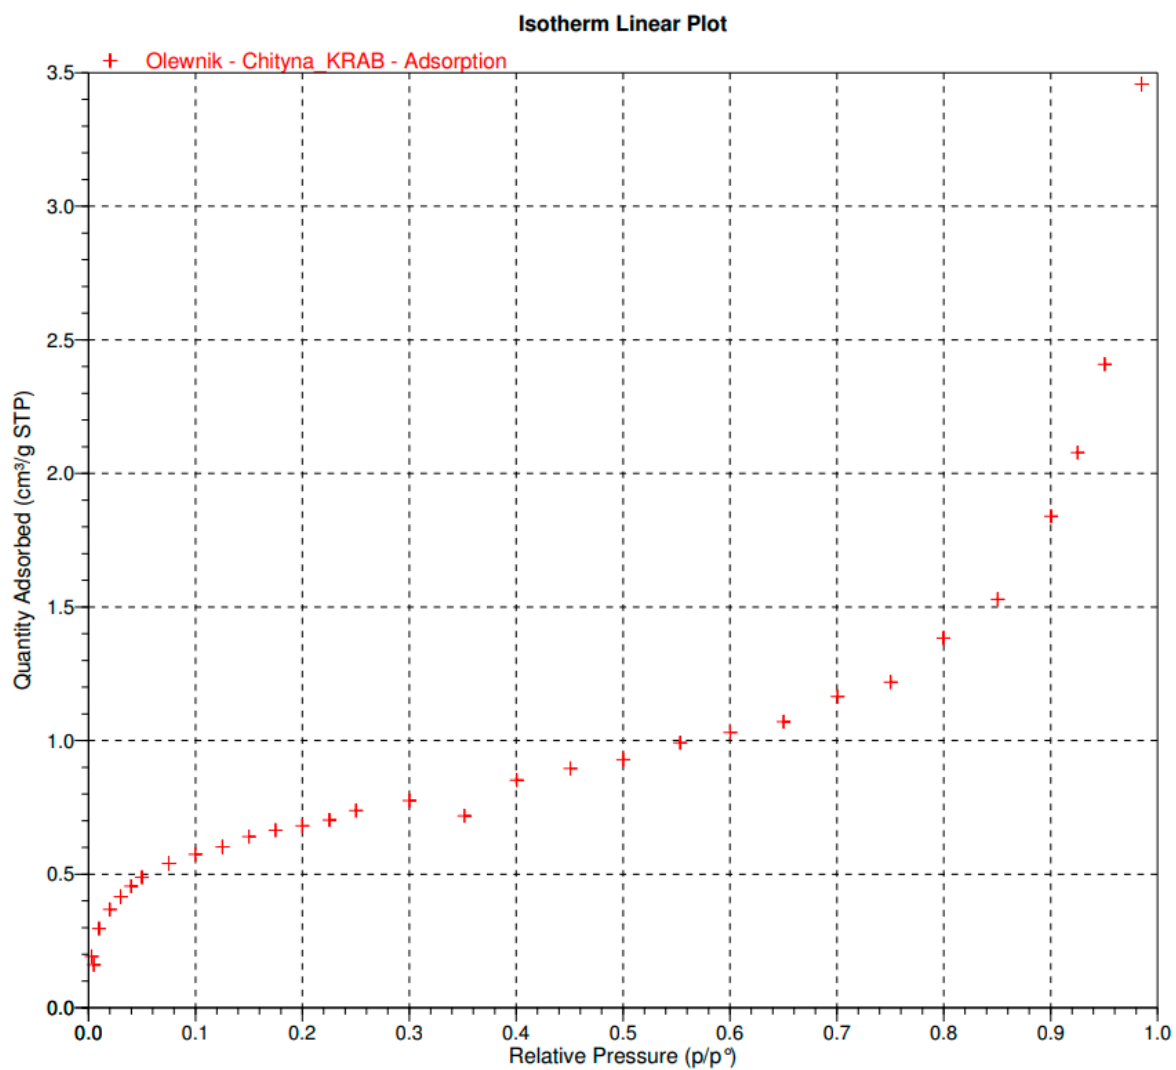

**Figure S1.** N<sub>2</sub> adsorption isotherm on the CH surface

Started: 2022-10-26 9:54:00  
Completed: 2022-10-26 12:11:47  
Report Time: 2022-10-28 10:32:44  
Sample Mass: 0.1543 g  
Equilibration Interval: 5 s  
Sample Density: 1.000 g/cm<sup>3</sup>

Analysis Adsorptive: N2  
Analysis Bath Temp.: 77.370 K  
Thermal Correction: No  
Cold Free Space: -0.8919 cm<sup>3</sup> Measured  
Low Pressure Dose: None  
Automatic Degas: No

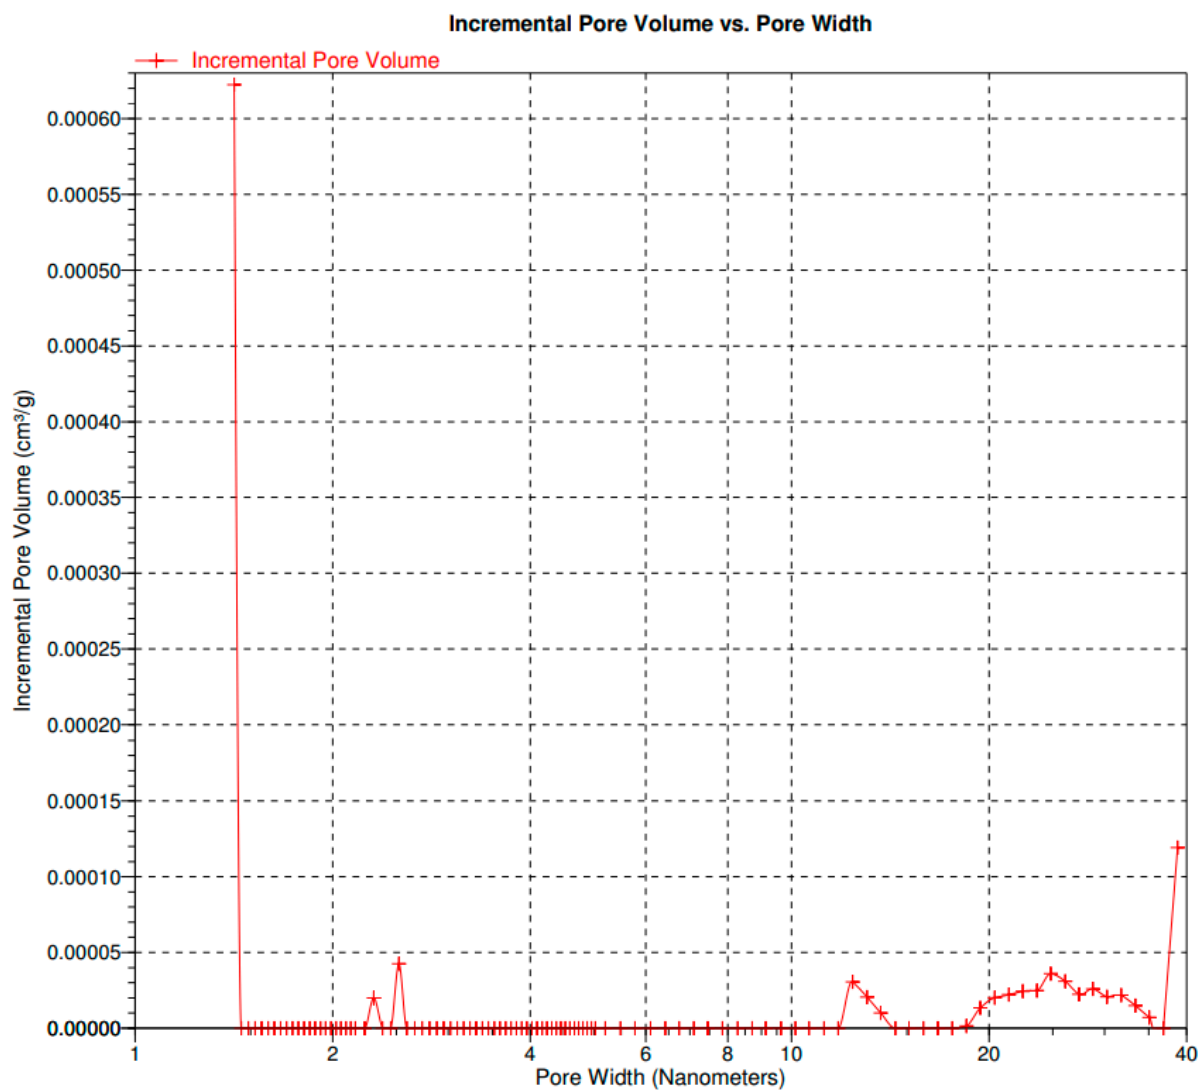

**Figure S2.** Incremental Pore Volume vs. Pore Width – CH Surface analysis

## SEM images of CH

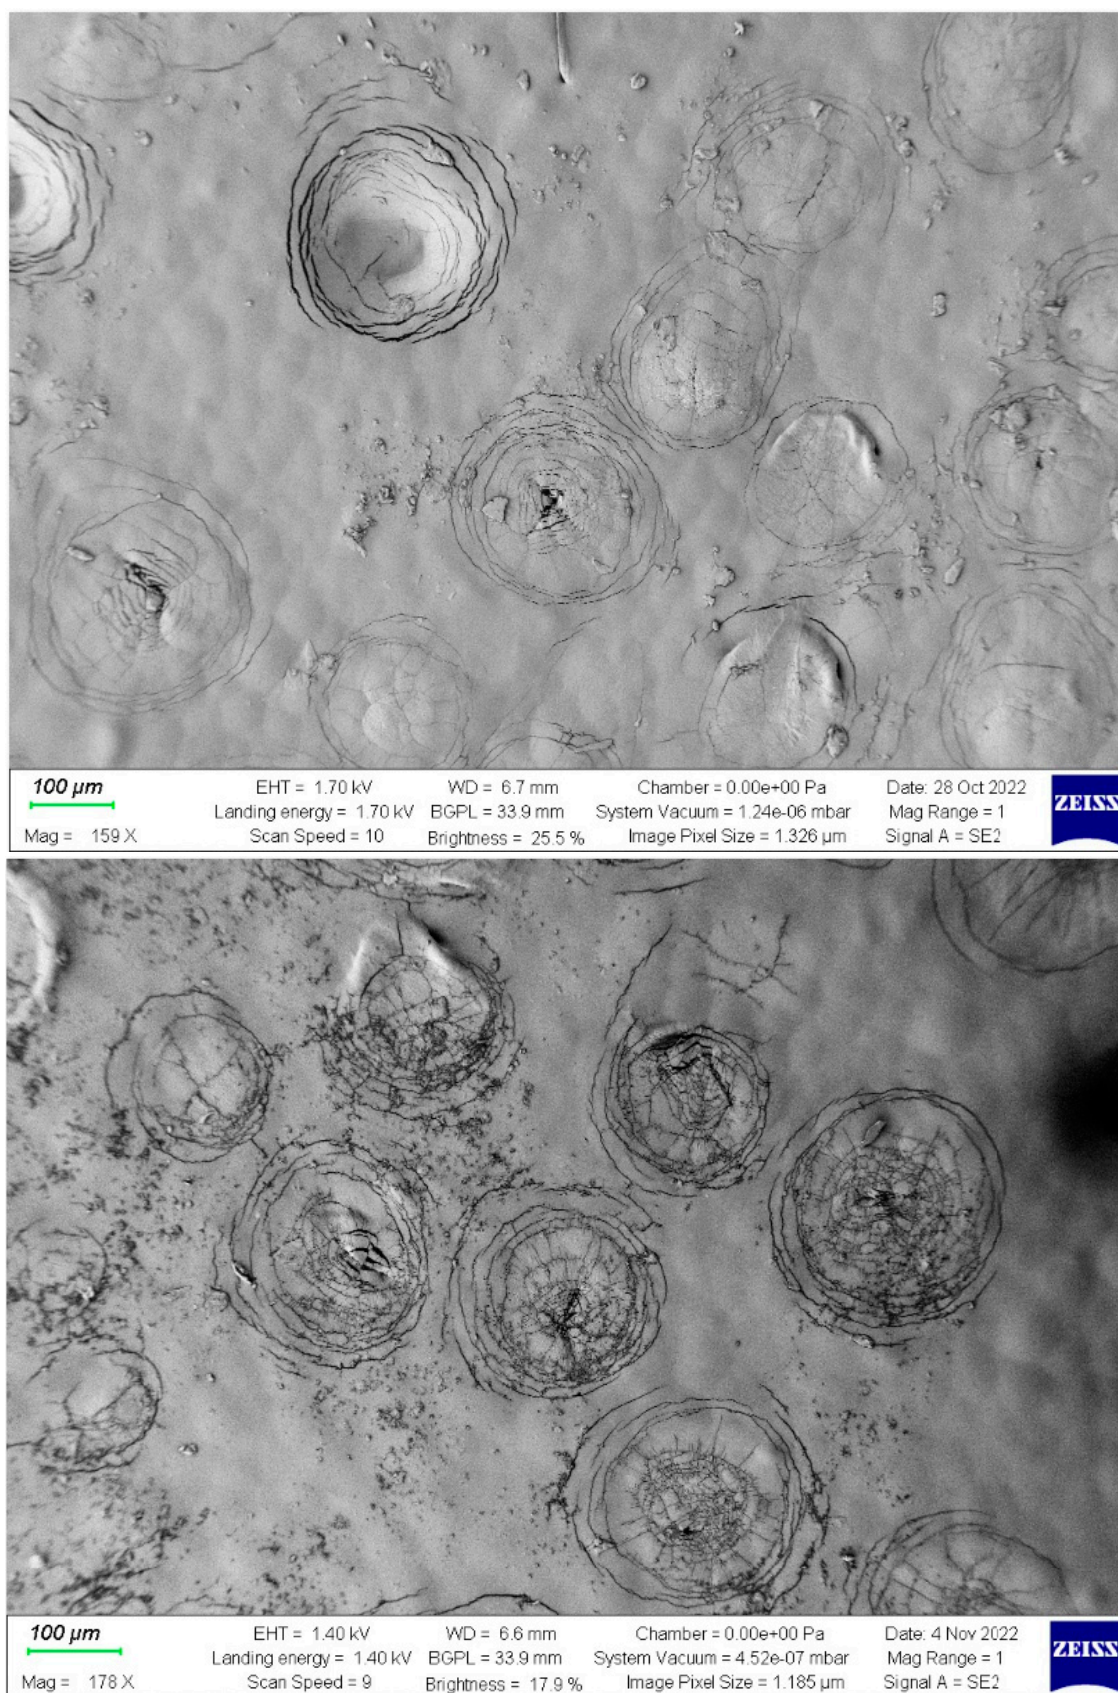

**Figure S3.** SEM images of CH – part 1



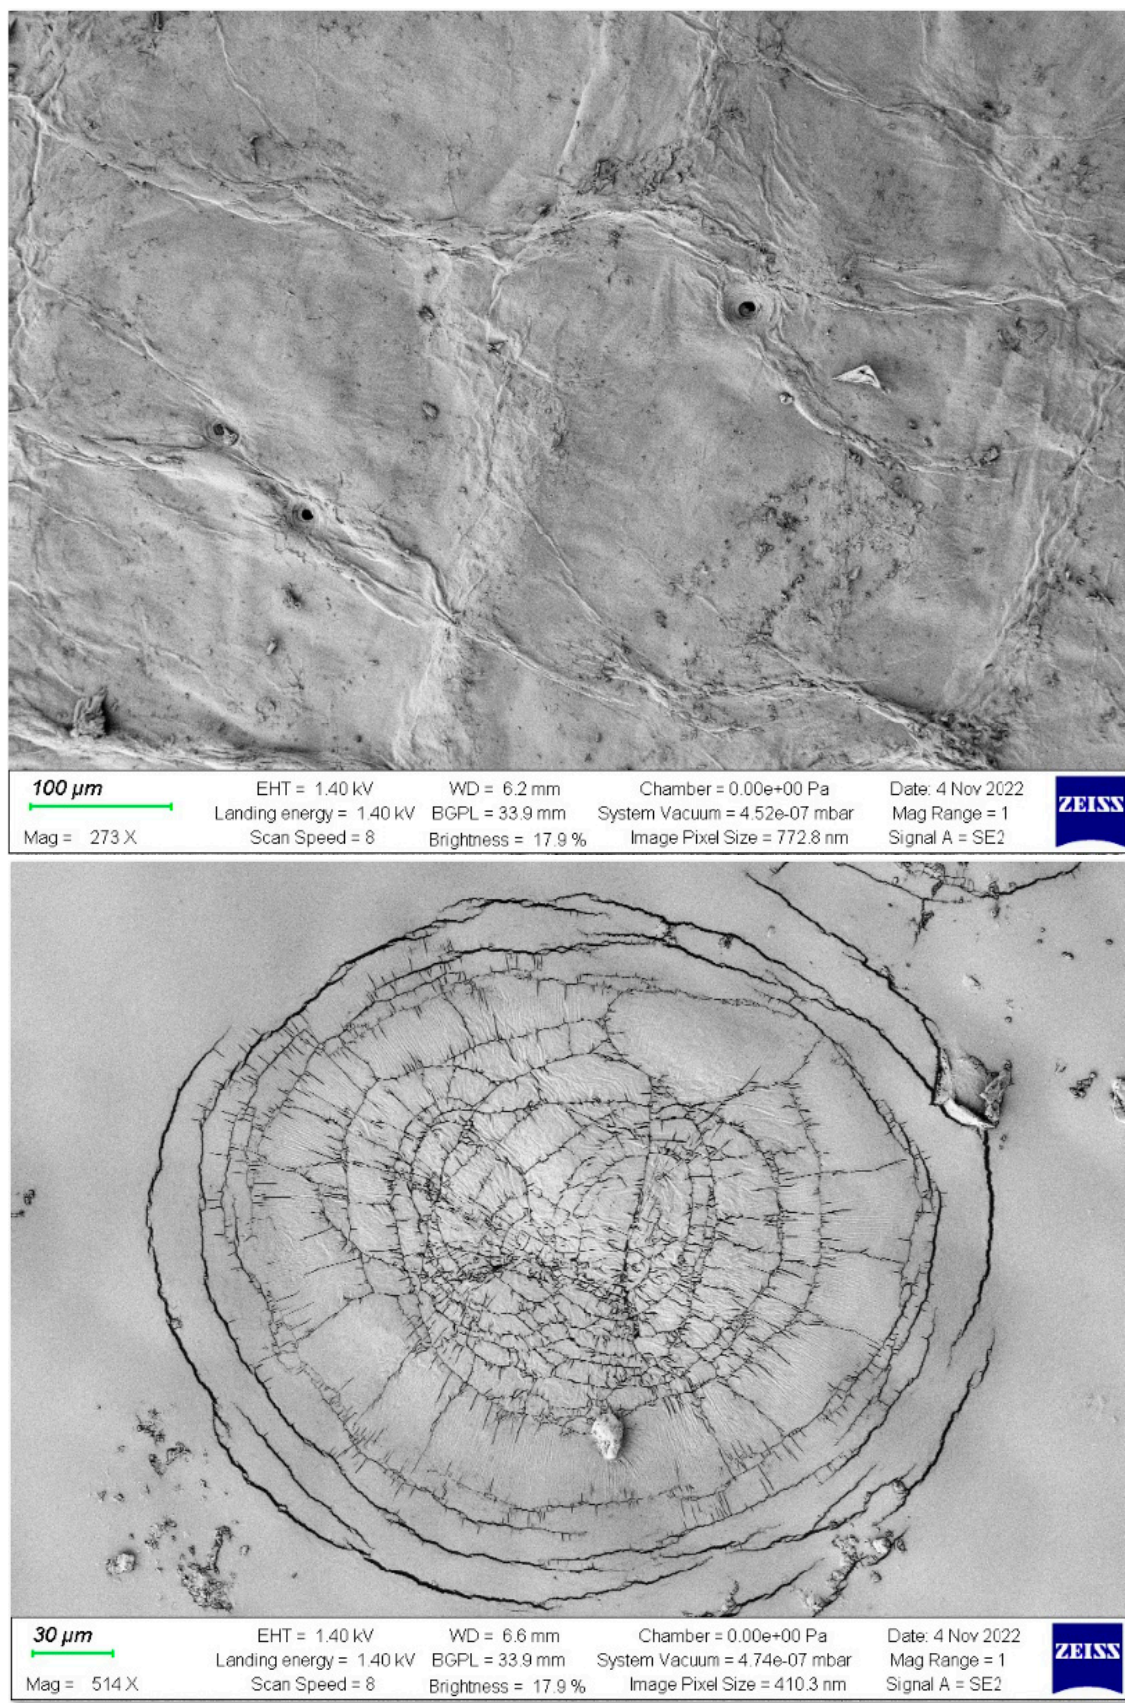

**Figure S4. SEM images of CH – part 2**
